# Supplementary material for: Facile formation of CoN4 active sites onto a SiO2 support to achieve robust CO2 and proton reduction in a noble-metal-free photocatalytic system
Source: Royal Society of Chemistry journal article supplement (doi:10.1039/c9ta00949c), 2019-01-01
Supplement: c9ta00949c1.pdf [file c9ta00949c1.pdf]

**Electronic Supplementary Information**

**for**

**Facile formation of CoN<sub>4</sub> active sites onto SiO<sub>2</sub>  
support to achieve robust CO<sub>2</sub> and protons reduction  
in a noble-metal-free photocatalytic system**

Jun-Chao Hu, Meng-Xi Gui, Wu Xia, Jin Wu, Yong-Ning Zhou, Ningdong Feng,  
Junwu Xiao, Hongfang Liu, Chen-Ho Tung, Li-Zhu Wu and Feng Wang\*

## **Table of Contents**

- 1. Chemicals**
- 2. X-Ray diffraction pattern of  $g\text{-C}_3\text{N}_4$**
- 3. UV-vis diffuse reflectance spectrum of  $g\text{-C}_3\text{N}_4$**
- 4. UV-vis diffuse reflectance spectra of raw  $\text{SiO}_2$ ,  $\text{NH}_2\text{-SiO}_2$  and  $\text{CoN}_4\text{-SiO}_2$**
- 5. IR spectra**
- 6. XPS spectra**
- 7. Photocatalytic syngas production in  $\text{CH}_3\text{CN}$**
- 8. Emission spectra of  $g\text{-C}_3\text{N}_4$  in the presence of TEA**
- 9. Comparison of the reported heterogeneous photocatalytic syngas production systems**

## 1. Chemicals

Tetraethylorthosilicate (TEOS),  $\gamma$ -aminopropyltrimethoxysilane (APTMS), triethylamine, ammonium hydroxide ( $\text{NH}_3 \cdot \text{H}_2\text{O}$ , 25%-28%), triethylamine (TEA) and cobalt chloride hexahydrate ( $\text{CoCl}_2 \cdot 6\text{H}_2\text{O}$ ) were purchased from commercial suppliers (Sinopharm chemical reagent co., LTD, Adamas and Sigma-Aldrich) and used without further purification.  $\text{CO}_2$  (99.999%), CO (99.999%),  $\text{CH}_4$  (99.99%) were purchased from commercial supplier (Huaerwen).  $^{13}\text{CO}_2$  (99%  $^{13}\text{C}$  atom) were purchased from Aldrich. All solvents of analytical grade were purchased from commercial suppliers and used without further purification. **g-C<sub>3</sub>N<sub>4</sub>**: g-C<sub>3</sub>N<sub>4</sub> were synthesized according to previously reported procedures by heating approximately 5 g of melamine at a rate of 5 K min<sup>-1</sup> to 823 K and then maintaining this temperature for another 2 h.

## 2. X-Ray diffraction pattern of $g\text{-C}_3\text{N}_4$

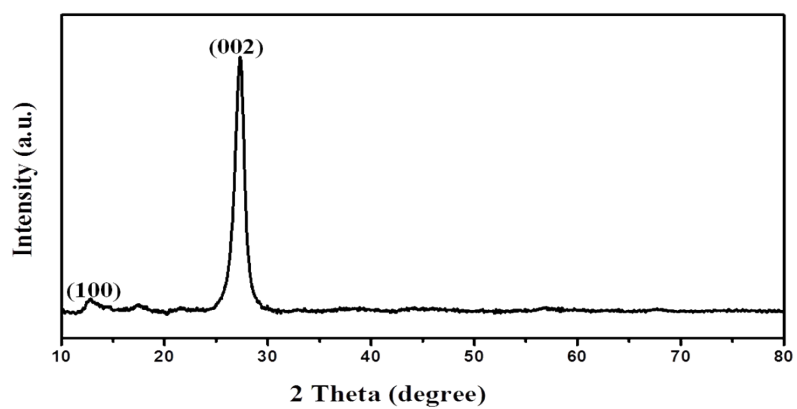

**Figure S1.** X-Ray diffraction spectrum of  $g\text{-C}_3\text{N}_4$ .

### 3. UV-vis diffuse reflectance spectrum of $g\text{-C}_3\text{N}_4$

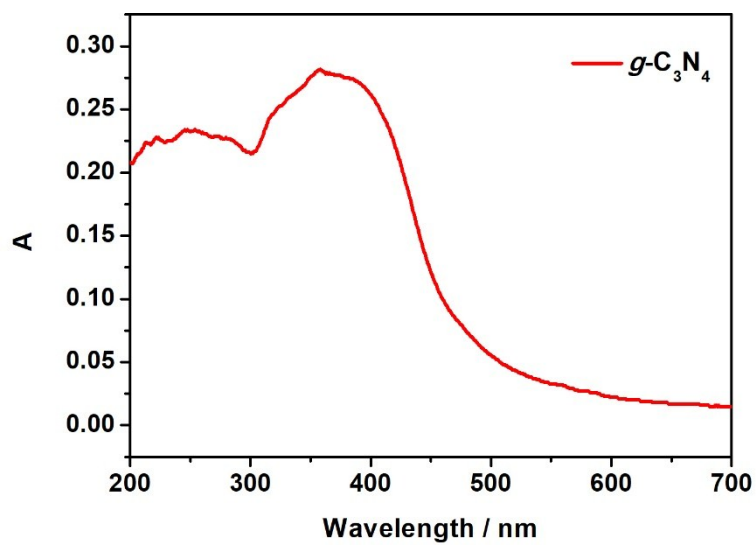

Figure S2. UV-vis diffuse reflectance spectrum of  $g\text{-C}_3\text{N}_4$

#### 4. UV-vis diffuse reflectance spectra of raw $\text{SiO}_2$ , $\text{NH}_2\text{-SiO}_2$ and $\text{CoN}_4\text{-SiO}_2$

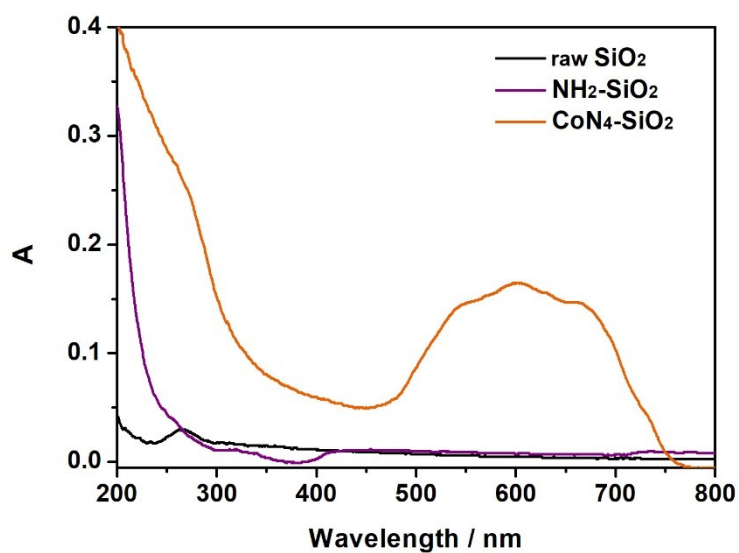

**Figure S3.** UV-vis diffuse reflectance spectra (DRS) of raw  $\text{SiO}_2$ ,  $\text{NH}_2\text{-SiO}_2$ , and  $\text{CoN}_4\text{-SiO}_2$

## 5. IR spectra

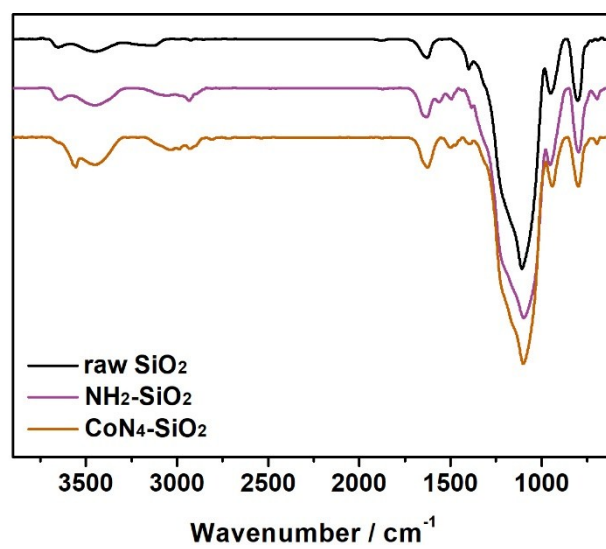

**Figure S4.** IR spectra of raw SiO<sub>2</sub>, NH<sub>2</sub>-SiO<sub>2</sub>, and CoN<sub>4</sub>-SiO<sub>2</sub>

## 6. XPS spectra

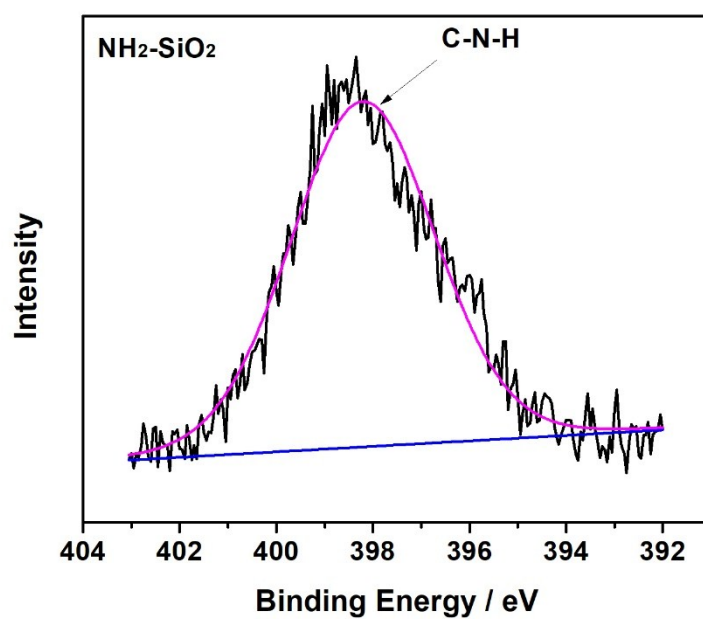

Figure S5. XPS spectrum of *N* 1s of NH<sub>2</sub>-SiO<sub>2</sub>



## 7. Photocatalytic syngas production in CH<sub>3</sub>CN

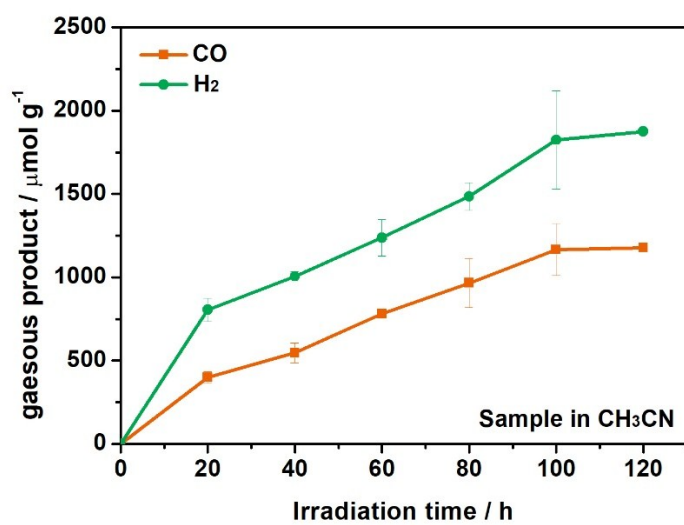

**Figure S6.** Long-time photocatalysis in CO<sub>2</sub>-saturated CH<sub>3</sub>CN; samples composition: CoN<sub>4</sub>-SiO<sub>2</sub> (5.00 mg), g-C<sub>3</sub>N<sub>4</sub> (10.00 mg), TEA (1.00 mL), total volume = 5.00 mL. The sample was irradiated under visible light (Blue LED,  $\lambda_{\text{max}}$  = 450 nm).

## 8. Emission spectra of $g\text{-C}_3\text{N}_4$ in the presence of TEA

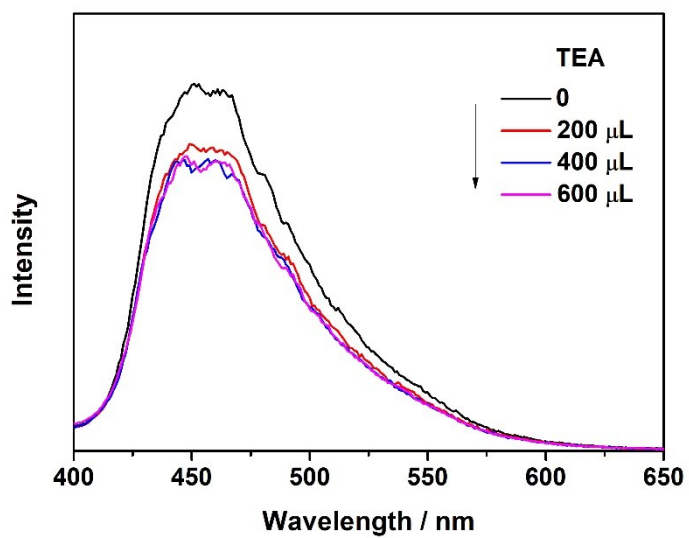

**Figure S7.** Emission spectra of  $g\text{-C}_3\text{N}_4$  in  $\text{CH}_3\text{CN}$  in the absence and presence of  $\text{NH}_2\text{-SiO}_2$  (up) or TEA (bottom) (excitation wavelength = 380 nm).

## 9. Comparison of the reported heterogeneous photocatalytic syngas production systems

**Table S1.** Comparison of the reported heterogeneous photocatalytic syngas production systems

| No.              | Catalyst / Photocatalyst               | Photosensitizer                         | $n(\text{CO})$<br>[ $\mu\text{mol}$ ] | $n(\text{H}_2)$<br>[ $\mu\text{mol}$ ] | $\text{CO}/\text{H}_2$ ratio | $n/m$ (CO)<br>[ $\mu\text{mol}\cdot\text{g}^{-1}$ ] | $n/m$ ( $\text{H}_2$ )<br>[ $\mu\text{mol}\cdot\text{g}^{-1}$ ] | <i>Lifetime</i><br>[h] | Ref.      |
|------------------|----------------------------------------|-----------------------------------------|---------------------------------------|----------------------------------------|------------------------------|-----------------------------------------------------|-----------------------------------------------------------------|------------------------|-----------|
| 1 <sup>[a]</sup> | <b>CoN<sub>4</sub>-SiO<sub>2</sub></b> | <i>g</i> -C <sub>3</sub> N <sub>4</sub> | 11.34                                 | 13.93                                  | 1.0 : 1.2                    | 2267                                                | 2786                                                            | 140                    | This work |
| 2 <sup>[b]</sup> | <b>CoN<sub>4</sub>-SiO<sub>2</sub></b> | <i>g</i> -C <sub>3</sub> N <sub>4</sub> | 5.89                                  | 9.38                                   | 1.0 : 1.6                    | 1178                                                | 1875                                                            | 120                    | This work |
| 4                | ReP + CoP/Dye/TiO <sub>2</sub>         | -                                       | 7.73                                  | 2.21                                   | 3.5 : 1.0                    | 773                                                 | 221                                                             | 10                     | [c]       |
| 5                | Rh(PD)Au@STO                           | -                                       | 138.45                                | 26.03                                  | 5.3 : 1.0                    | 1846                                                | 347                                                             | 5                      | [d]       |

[a]. In CH<sub>3</sub>CN/H<sub>2</sub>O ( $v(\text{H}_2\text{O}) = 100 \mu\text{L}$ , total volume = 5.00 mL)

[b]. In CH<sub>3</sub>CN (total volume = 5.00 mL)

[c]. J.-S. Lee, D.-I. Won, W.-J. Jung, H.-J. Son, C. Pac, S. O. Kang, *Angewandte Chemie-International Edition* **2017**, 56, 976-980.

[d]. D. Li, S. Ouyang, H. Xu, D. Lu, M. Zhao, X. Zhang, J. Ye, *Chem. Commun.* **2016**, 52, 5989-5992.
